# Supplementary material for: In vivo CRISPR screens reveal Serpinb9 and Adam2 as regulators of immune therapy response in lung cancer
Source: PubMed Central journal article supplement (PMC10232477; doi:10.1038/s41467-023-38841-7), 2023-05-31
Supplement: 41467_2023_38841_MOESM3_ESM.pdf [file 41467_2023_38841_MOESM3_ESM.pdf]

## Description of Additional Supplementary Files

### **Supplementary Data 1. List of multi-guide sgRNA libraries used in this manuscript related to Main Figure 1 F and G; 3 A and B; Supplementary Information 1C; 4 A-C; 5 A-D; 9 A**

Sheet 1 lists all the genes, sgRNAs as well as oligo sequences used to clone the immune gene library.

Sheet 2 lists all the genes, sgRNAs as well as oligo sequences used to clone the non-targeting control library.

Sheet 2 lists the primers used to clone the immune gene as well as the non-targeting control library.

### **Supplementary Data 2. Summary of NGS counts and library coverage related to Supplementary Information 1C**

List of all the genes, guides and counts for all sgRNAs targeting immune genes in plasmid vs. transduced mouse embryonic fibroblasts (MEFs).

### **Supplementary Data 3. Summary of NGS counts and coverage in *Kras*<sup>G12D</sup> and *Braf*<sup>V600E</sup> lungs transduced with Immune library related to Main Figure 1 F and G; 3 A and B; Supplementary Information 1C; 4 A-C; 5 A-D; 9 A**

Sheet 1 lists *Kras*<sup>G12D</sup> Lung gene summary

Sheet 2 lists *Kras*<sup>G12D</sup> Lung sgRNA counts normalized

Sheet 3 lists *Braf*<sup>V600E</sup> Lung gene summary

Sheet 4 lists *Kras*<sup>V600E</sup> Lung sgRNA counts normalized

### **Supplementary Data 4. List of DESeq2 LFC from RNA sequencing data *\_GSEA\_MetaScape\_gProfiler* in *Adam2* KO compared to CTRL tumors related to Main Figure 3 G-H; Supplementary Information 4 A-C**

Sheet 1 DESeq2LFC from *Adam2* ko vs. control lung tumors

Sheet 2 GSEA report for positively regulated genes in *Adam2* ko lungs

Sheet 3 GSEA report for negatively regulated genes in *Adam2* ko lungs

Sheet 4 Metascape Annotation

Sheet 5 Metascape Enrichment of biological processes enriched in *Adam2* ko lungs

Sheet 5 gProfiler homo sapiens of pathways enriched in *Adam2* ko lungs

### **Supplementary Data 5. *ADAM2* mRNA expression in Pan Cancer, LUAD and LUSC from TCGA datasets related to Supplementary Information 9 B; 29 A-D**

Sheet 1 lists the expression level, copy number alterations and mutations of *ADAM2* in 510 lung adenocarcinoma (LUAD) TCGA tumors.

Sheet 2 lists the expression level, copy number alterations and mutations of *ADAM2* in 498 lung squamous cell carcinoma (LUSC) TCGA tumors.

Sheet 3 lists the expression level, copy number alterations and mutations of *ADAM2* in 8424 TCGA tumors of the indicate cancer type (pan cancer analysis).

### **Supplementary Data 6. *ADAM2* mRNA expression in *Kras* and *Braf* LUAD analysed from TCGA database related to Main Figure 6A; Supplementary Figure 29E**

**Supplementary Data 7. Differential expression and pathway enrichment analysis of TCGA LUAD samples with ADAM2 expression related to Main Figure 6D; Supplementary Information 30-37**

Sheet 1 Differential expression analysis of TCGA LUAD samples with ADAM2 expression

Sheet 2 Pathway enrichment analysis of TCGA LUAD samples with ADAM2 expression

**Supplementary Data 8. List of animal model, antibodies, cell lines and primers used in the study**

Sheet 1 List of mouse models used in the study

Sheet 2 List of flow cytometry antibodies used in the study

Sheet 3 List of IHC antibodies used in the study

Sheet 4 List of IMC antibodies used in the study

Sheet 4 List of WB antibodies used in the study

Sheet 5 List of cytokines and proteome profiler mouse cytokine array kit used in the study

Sheet 6 List of RNA specific probes used for RNA scope analysis

Sheet 6 Cell lines used in the study

Sheet 7 QRT primers used in the study

Sheet 8 List of antibodies used in CyTOF analysis
